# Supplementary material for: Adsorption characteristics and mechanism of sewage sludge-derived adsorbent for removing sulfonated methyl phenol resin in wastewater
Source: Royal Society of Chemistry journal article supplement (doi:10.1039/c5ra17125c), 2015-01-01
Supplement: c5ra17125c1.pdf [file c5ra17125c1.pdf]

## Appendix 1

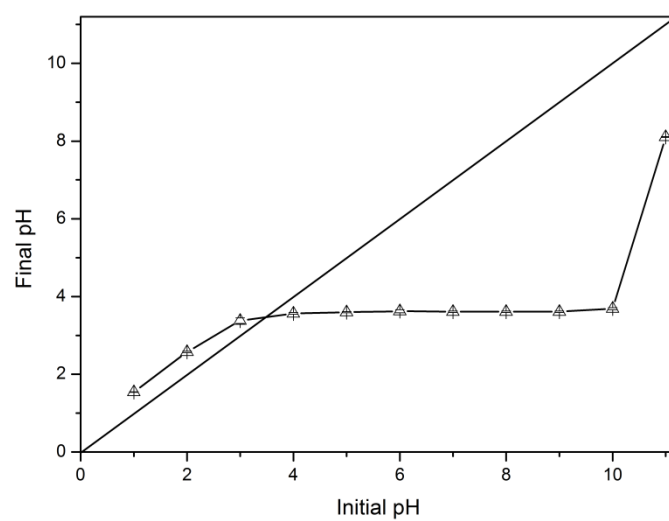

**Fig. S1** The  $\text{pH}_{\text{pzc}}$  of SSA by pH drift method

## Appendix 2

### Nomenclature

|              |                                                                                                                  |
|--------------|------------------------------------------------------------------------------------------------------------------|
| SMP          | Sulfonated methyl phenol resin                                                                                   |
| SSA          | Sewage sludge-derived adsorbent                                                                                  |
| WRB          | Wheat straw biochar                                                                                              |
| WEB          | Walnut shell biochar                                                                                             |
| TOC          | Total organic carbon                                                                                             |
| COD          | Chemical oxygen demand                                                                                           |
| $C_0$        | Initial concentration of SMP solution, ( $\text{mg L}^{-1}$ )                                                    |
| $C_e$        | Residual SMP concentration at equilibrium, ( $\text{mg L}^{-1}$ )                                                |
| $m$          | SSA dosage, ( $\text{g L}^{-1}$ )                                                                                |
| $t$          | Adsorption time (h)                                                                                              |
| $q_t$        | Adsorption quality of SMP on SSA at various time $t$ ( $\text{mg g}^{-1}$ )                                      |
| $q_1$        | Adsorption quality of SMP on SSA at equilibrium ( $\text{mg g}^{-1}$ ) for pseudo-first-order kinetic model      |
| $k_1$        | The pseudo-first-order rate constant ( $\text{h}^{-1}$ )                                                         |
| $q_2$        | Adsorption quality of SMP on SSA at equilibrium for the pseudo-second-order kinetic model ( $\text{mg g}^{-1}$ ) |
| $k_2$        | Pseudo-second-order rate constant ( $\text{g mg}^{-1} \text{h}^{-1}$ )                                           |
| $k_i$        | The intra-particle diffusion rate constant ( $\text{mg g}^{-1} \text{h}^{-0.5}$ )                                |
| $I$          | Intercept for the intra-particle diffusion kinetic model ( $\text{mg g}^{-1}$ )                                  |
| $q_m$        | Monolayer adsorption capacity of SMP on SSA estimated by Langmuir model ( $\text{mg g}^{-1}$ )                   |
| $b$          | Langmuir constant ( $\text{L mg}^{-1}$ )                                                                         |
| $K_F$        | Freundlich constant ( $\text{mg g}^{-1}(\text{mg L}^{-1})^{-1/n}$ )                                              |
| $n$          | Heterogeneity factor of the Freundlich isotherm model                                                            |
| $E_a$        | Adsorption activation energy in the SMP-SSA system ( $\text{kJ mol}^{-1}$ )                                      |
| $R$          | Gas constant ( $8.31 \text{ J (mol K)}^{-1}$ )                                                                   |
| $A$          | Pre-exponential factor                                                                                           |
| $\Delta G^0$ | Gibb's free energy change ( $\text{kJ mol}^{-1}$ )                                                               |
| $\Delta H^0$ | Enthalpy change ( $\text{kJ mol}^{-1}$ )                                                                         |
| $\Delta S^0$ | Entropy changes ( $\text{J mol}^{-1} \text{K}^{-1}$ )                                                            |

---

### Appendix 3

$$q_e = \frac{(C_0 - C_e)}{m} \quad \text{Eq. (1)}$$

$$\ln(q_1 - q_t) = \ln q_1 - k_1 t \quad \text{Eq. (2)}$$

$$\frac{t}{q_t} = \frac{1}{q_2^2 k_2} + \frac{t}{q_2} \quad \text{Eq. (3)}$$

$$q_t = k_i t^{0.5} + I \quad \text{Eq. (4)}$$

$$q_e = \frac{q_m C_e b}{1 + b C_e} \quad \text{Eq. (5)}$$

$$q_e = K_F C_e^{1/n} \quad \text{Eq. (6)}$$

$$k = A e^{-\frac{E_a}{RT}} \quad \text{Eq. (7)}$$

$$\ln \frac{k_1}{k_2} = \frac{E_a (T_1 - T_2)}{RT_1 T_2} \quad \text{Eq. (8)}$$

(8)

$$\Delta G^0 = \Delta H^0 - T \Delta S^0 \quad \text{Eq. (9)}$$

$$\ln \frac{q_e m}{C_e} = \frac{\Delta S^0}{R} - \frac{\Delta H^0}{RT} \quad \text{Eq. (10)}$$
